# Supplementary material for: exRNA-eCLIP intersection analysis reveals a map of extracellular RNA binding proteins and associated RNAs across major human biofluids and carriers
Source: PubMed Central journal article supplement (PMC10203258; doi:10.1016/j.xgen.2023.100303), 2023-04-20
Supplement: mmc1.pdf [file mmc1.pdf]

## Supplemental information

### **exRNA-eCLIP intersection analysis reveals a map of extracellular RNA binding proteins and associated RNAs across major human biofluids and carriers**

**Emily L. LaPlante, Alessandra Stürchler, Robert Fullem, David Chen, Anne C. Starner, Emmanuel Esquivel, Eric Alsop, Andrew R. Jackson, Ionita Ghiran, Getulio Pereira, Joel Rozowsky, Justin Chang, Mark B. Gerstein, Roger P. Alexander, Matthew E. Roth, Jeffrey L. Franklin, Robert J. Coffey, Robert L. Raffai, Isabelle M. Mansuy, Stavros Stavrakis, Andrew J. deMello, Louise C. Laurent, Yi-Ting Wang, Chia-Feng Tsai, Tao Liu, Jennifer Jones, Kendall Van Keuren-Jensen, Eric Van Nostrand, Bogdan Mateescu, and Aleksandar Milosavljevic**

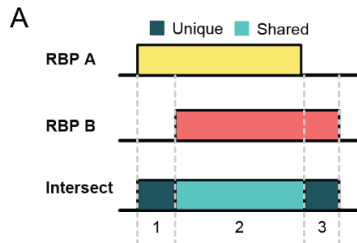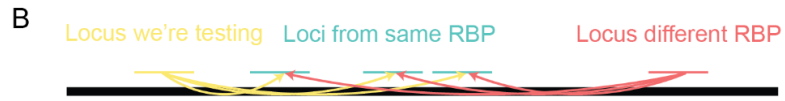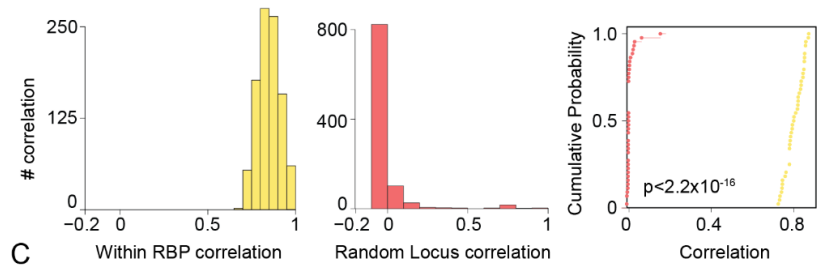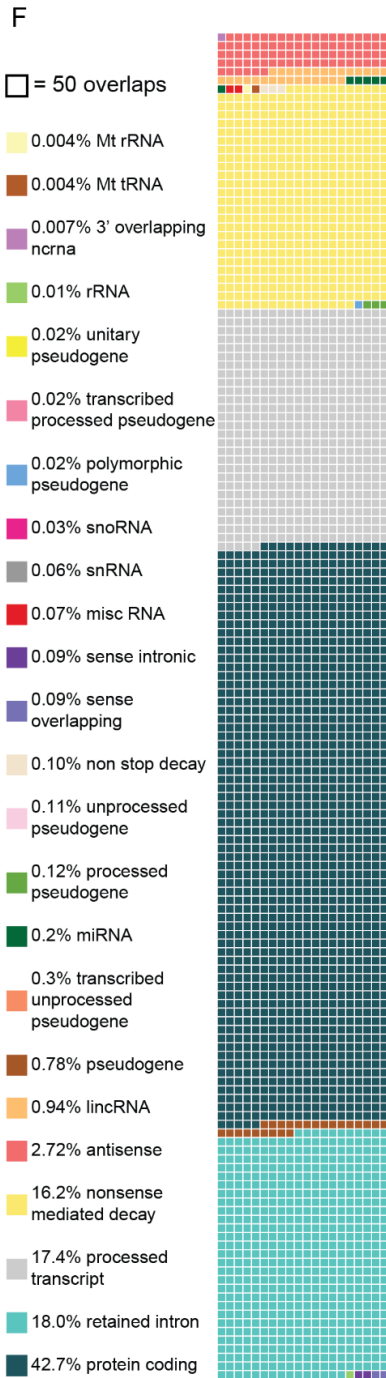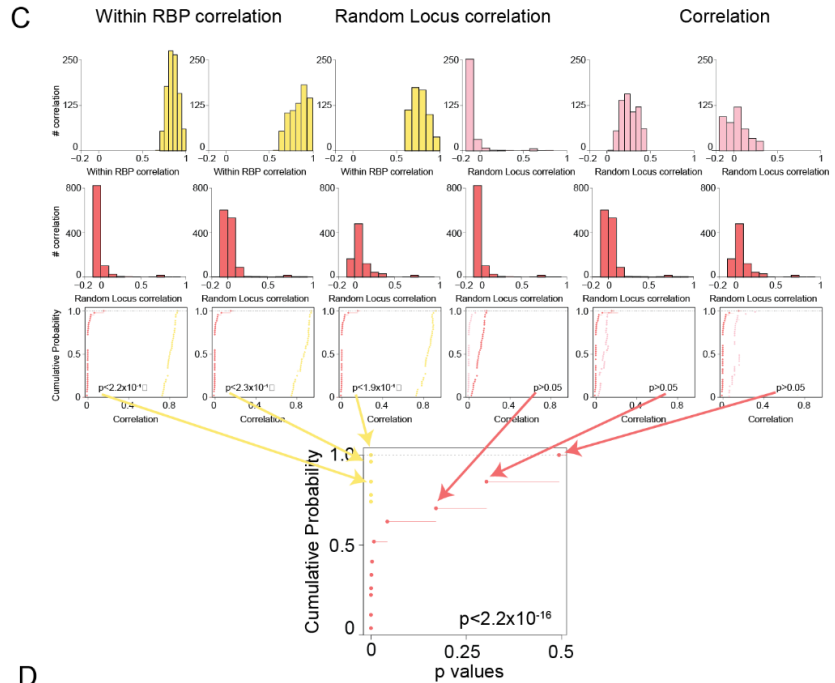

**D**

Minimum # samples with coverage with significant correlations: 30 (grey), 20 (red), 10 (yellow)

Minimum coverage of loci with significant correlations: 5 (teal), 2 (dark teal)

| Cell media | Plasma                  | Cell media FDR value  | Plasma FDR value      |
|------------|-------------------------|-----------------------|-----------------------|
| AOR        | 5.03x10 <sup>-3</sup>   | 4.52x10 <sup>-6</sup> | 4.52x10 <sup>-6</sup> |
| BCLAF1     | 3.67x10 <sup>-6</sup>   | 2.07x10 <sup>-2</sup> | 2.07x10 <sup>-2</sup> |
| BUD13      | 1.35x10 <sup>-2</sup>   | 1.35x10 <sup>-2</sup> | 1.35x10 <sup>-2</sup> |
| CSTF2T     | 8.64x10 <sup>-3</sup>   | 1.14x10 <sup>-3</sup> | 1.14x10 <sup>-3</sup> |
| DDX3X      | 8.58x10 <sup>-3</sup>   | 3.10x10 <sup>-2</sup> | 3.10x10 <sup>-2</sup> |
| DGCR8      | 6.07x10 <sup>-4</sup>   | 7.40x10 <sup>-3</sup> | 7.40x10 <sup>-3</sup> |
| DHX30      | 2.84x10 <sup>-3</sup>   | 3.09x10 <sup>-3</sup> | 3.09x10 <sup>-3</sup> |
| DROSHA     | 8.54x10 <sup>-4</sup>   | 3.05x10 <sup>-3</sup> | 3.05x10 <sup>-3</sup> |
| EFTUD2     | 7.85x10 <sup>-6</sup>   | 8.28x10 <sup>-3</sup> | 8.28x10 <sup>-3</sup> |
| EXOSC5     | 3.66x10 <sup>-2</sup>   | 3.66x10 <sup>-2</sup> | 3.66x10 <sup>-2</sup> |
| FASTKD2    | 1.35x10 <sup>-4</sup>   | 4.72x10 <sup>-2</sup> | 4.72x10 <sup>-2</sup> |
| FTO        | 1.14x10 <sup>-6</sup>   | 1.17x10 <sup>-2</sup> | 1.17x10 <sup>-2</sup> |
| GEMIN5     | 2.22x10 <sup>-16</sup>  | 1.27x10 <sup>-3</sup> | 1.27x10 <sup>-3</sup> |
| GRWD1      | 7.64x10 <sup>-7</sup>   | 2.22x10 <sup>-2</sup> | 2.22x10 <sup>-2</sup> |
| HNRNPL     | 8.64x10 <sup>-3</sup>   | 9.42x10 <sup>-3</sup> | 9.42x10 <sup>-3</sup> |
| ILF3       | 6.62x10 <sup>-5</sup>   | 4.37x10 <sup>-3</sup> | 4.37x10 <sup>-3</sup> |
| KHSRP      | 1.62x10 <sup>-3</sup>   | 2.22x10 <sup>-2</sup> | 2.22x10 <sup>-2</sup> |
| LARP7      | 3.33x10 <sup>-15</sup>  | 8.64x10 <sup>-3</sup> | 8.64x10 <sup>-3</sup> |
| LIN28B     | 1.91x10 <sup>-12</sup>  | 1.35x10 <sup>-2</sup> | 1.35x10 <sup>-2</sup> |
| NCRP2      | 2.98x10 <sup>-14</sup>  | 2.22x10 <sup>-2</sup> | 2.22x10 <sup>-2</sup> |
| NKRF       | 1.82x10 <sup>-3</sup>   | 3.10x10 <sup>-2</sup> | 3.10x10 <sup>-2</sup> |
| PIPG       | 2.43x10 <sup>-8</sup>   | 1.63x10 <sup>-3</sup> | 1.63x10 <sup>-3</sup> |
| PRPF4      | 1.12x10 <sup>-8</sup>   | 6.71x10 <sup>-3</sup> | 6.71x10 <sup>-3</sup> |
| PRPF8      | 1.22x10 <sup>-14</sup>  | 3.99x10 <sup>-7</sup> | 3.99x10 <sup>-7</sup> |
| RPS3       | 1.62x10 <sup>-6</sup>   | 8.28x10 <sup>-3</sup> | 8.28x10 <sup>-3</sup> |
| SF3A3      | 3.73x10 <sup>-5</sup>   | 8.64x10 <sup>-3</sup> | 8.64x10 <sup>-3</sup> |
| SF3B4      | 7.16x10 <sup>-13</sup>  | 9.66x10 <sup>-2</sup> | 9.66x10 <sup>-2</sup> |
| SLBP       | 3.99x10 <sup>-7</sup>   | 9.13x10 <sup>-4</sup> | 9.13x10 <sup>-4</sup> |
| SSB        | 7.82x10 <sup>-9</sup>   | 2.10x10 <sup>-3</sup> | 2.10x10 <sup>-3</sup> |
| TBRG4      | 1.11x10 <sup>-16</sup>  | 8.17x10 <sup>-3</sup> | 8.17x10 <sup>-3</sup> |
| UPF1       | 6.90x10 <sup>-10</sup>  | 6.82x10 <sup>-3</sup> | 6.82x10 <sup>-3</sup> |
| XPO5       | 3.73x10 <sup>-5</sup>   | 4.23x10 <sup>-3</sup> | 4.23x10 <sup>-3</sup> |
| ZNF622     | 6.98x10 <sup>-5</sup>   | 4.37x10 <sup>-2</sup> | 4.37x10 <sup>-2</sup> |
| ZNF800     | <2.22x10 <sup>-16</sup> | 1.82x10 <sup>-3</sup> | 1.82x10 <sup>-3</sup> |

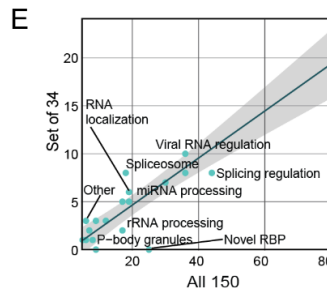

## Figure S1

**Kolmogorov–Smirnov tests identify RBPs with significantly correlated loci, Related to Figure 1. A)** An example of RBP intersections – intersecting two RBPs leads to 4 regions, 3 unique and 1 shared. **B)** Taking the distribution of a single locus and correlating it to all other loci from the same RBP. That distribution is compared to the correlations from a random locus with similar coverage to the same set of loci from the original RBP. Kolmogorov–Smirnov tests determine if the locus is significantly correlated. **C)** P values from all loci of a given RBP created using the method from Figure S1B are compared to p values generated by comparing correlation distributions of all the random loci (left 3 plots). The distribution of the random locus correlated to the RBP loci is also compared against the distribution of a random locus correlated to random loci to create the second distribution of p values (right 3 plots). Kolmogorov–Smirnov tests determine if the p value of all loci in an RBP distribution are significantly different than random to determine an RBP level metric. **D)** Kolmogorov–Smirnov test Bonferroni adjusted p values for RBPs significant in both cell media and human plasma. **E)** Linear regression between the number of RBPs with Kolmogorov–Smirnov test Bonferroni adjusted p values < 0.05 in both cell media and human plasma and the total number of RBPs in that category. Labeled categories fall outside the regression line. **F)** Gencode annotations that intersect with regions bound by the 34 RBPs. 1 box = 50 overlaps.

A

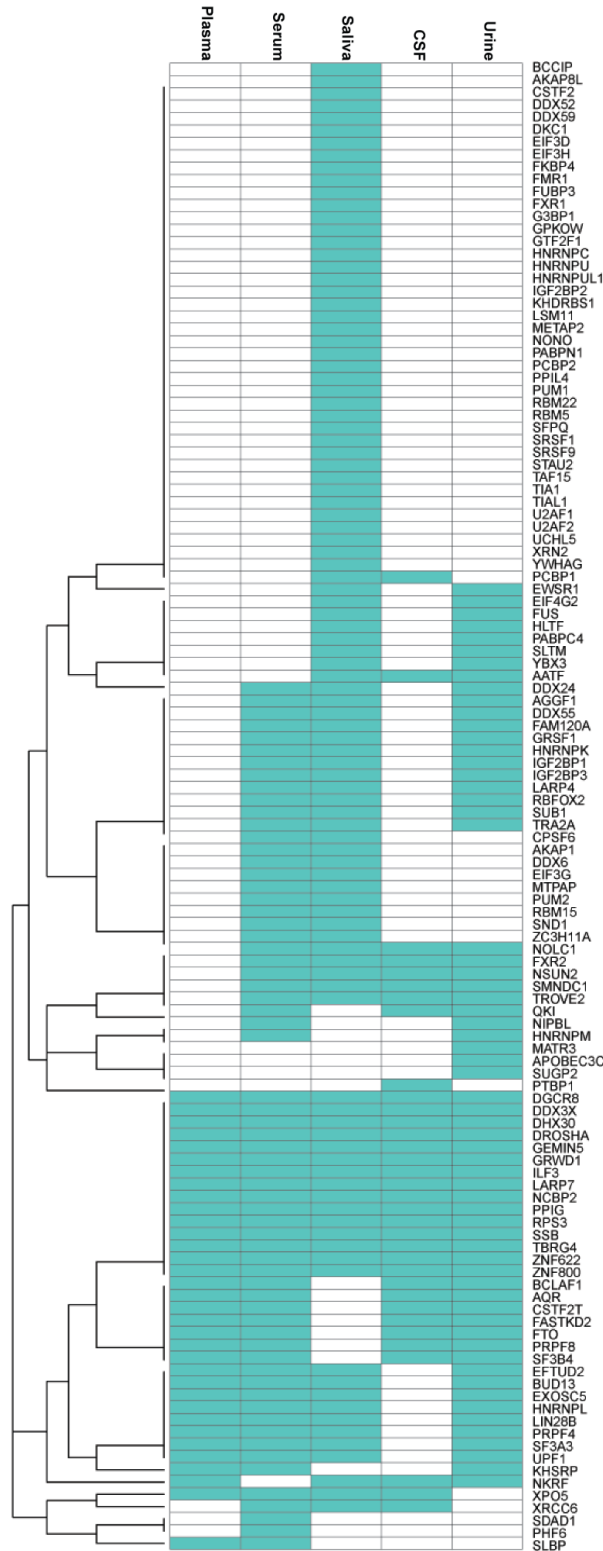

B

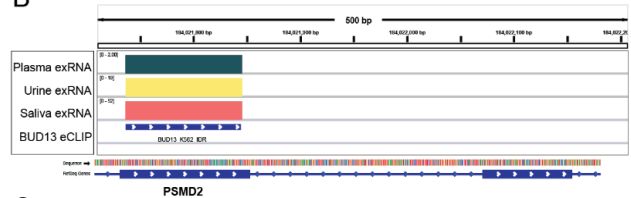

C

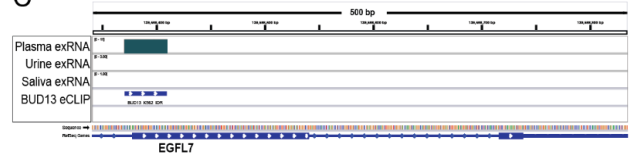

D

| RBP     | Correlation Footprint Unique RBP Loci | Correlation Footprint All RBP Loci | Detected in Condition Media Western Blot? |
|---------|---------------------------------------|------------------------------------|-------------------------------------------|
| AATF    | Yes                                   | No                                 | Not tested                                |
| BUD13   | No                                    | No                                 | No                                        |
| DGCR8   | Yes                                   | No                                 | Yes                                       |
| DHX30   | Yes                                   | No                                 | Not tested                                |
| DROSHA  | Yes                                   | No                                 | Not tested                                |
| EFTUD2  | No                                    | No                                 | Yes                                       |
| EXOSC5  | No                                    | Yes                                | Not tested                                |
| FASTKD2 | Yes                                   | No                                 | Not tested                                |
| FTO     | Yes                                   | No                                 | Yes                                       |
| FUS     | No                                    | Yes                                | Not tested                                |
| FXR2    | Yes                                   | No                                 | Not tested                                |
| GEMIN5  | Yes                                   | No                                 | Not tested                                |
| GRSF1   | No                                    | Yes                                | Not tested                                |
| HNRNPK  | No                                    | Yes                                | Not tested                                |
| HNRNPM  | No                                    | Yes                                | Not tested                                |
| IGF2BP1 | No                                    | No                                 | Not tested                                |
| IGF2BP3 | No                                    | Yes                                | Not tested                                |
| ILF3    | Yes                                   | No                                 | Yes                                       |
| KHSRP   | No                                    | Yes                                | Not tested                                |
| LARP4   | No                                    | No                                 | Not tested                                |
| LARP7   | Yes                                   | Yes                                | Not tested                                |
| LIN28B  | Yes                                   | No                                 | Yes                                       |
| MATR3   | No                                    | Yes                                | Not tested                                |
| NCBP2   | Yes                                   | No                                 | Yes                                       |
| NKRF    | Yes                                   | No                                 | Not tested                                |
| NOLC1   | Yes                                   | No                                 | Not tested                                |
| NSUN2   | Yes                                   | Yes                                | Not tested                                |
| PCBP1   | Yes                                   | No                                 | Not tested                                |
| PPIG    | Yes                                   | Yes                                | No                                        |
| PRPF4   | No                                    | No                                 | Not tested                                |
| PRPF8   | No                                    | No                                 | Yes                                       |
| PTBP1   | Yes                                   | No                                 | Not tested                                |
| PUM2    | No                                    | No                                 | Not tested                                |
| QKI     | Yes                                   | No                                 | Not tested                                |
| RBF, X2 | No                                    | No                                 | Not tested                                |
| RPS3    | Yes                                   | No                                 | Yes                                       |
| SF3A3   | No                                    | No                                 | Yes                                       |
| SF3B4   | Yes                                   | No                                 | Yes                                       |
| SLTM    | Yes                                   | No                                 | Not tested                                |
| SMNDC1  | Yes                                   | No                                 | Not tested                                |
| SND1    | No                                    | No                                 | Not tested                                |
| SSB     | Yes                                   | Yes                                | Yes                                       |
| SUB1    | No                                    | No                                 | Not tested                                |
| TBRG4   | Yes                                   | Yes                                | Not tested                                |
| TRA2A   | No                                    | No                                 | Not tested                                |
| TROVE2  | Yes                                   | No                                 | Not tested                                |
| U2AF2   | No                                    | No                                 | Not tested                                |
| UPF1    | No                                    | Yes                                | Not tested                                |
| XPO5    | Yes                                   | No                                 | Yes                                       |
| XRC6    | Yes                                   | No                                 | Not tested                                |
| XRN2    | Yes                                   | No                                 | Not tested                                |
| ZNF622  | Yes                                   | No                                 | Yes                                       |
| ZNF800  | Yes                                   | No                                 | Not tested                                |

## Figure S2

**Results of exRBP Correlation Footprinting Analysis, Related to Figure 2. A)** The RBPs that were detected by correlation footprinting in each analyzed biofluid. **B)** Example Integrative Genomic Viewer trace of a BUD13 eCLIP binding locus used for correlation footprinting, here exRNA samples show expression across all biofluids. **C)** Example Integrative Genomic Viewer trace of a BUD13 eCLIP binding locus used for correlation footprinting, here exRNA samples show biofluid specific expression only in plasma. **D)** Comparison between correlation footprinting methods in CSF across 53 RBPs. Showing results for when either filtering to only loci unique to an RBP before footprinting (column 2) or including all loci of an RBP when footprinting (column 3). And how those results compare to the western blot validation results for conditioned media (column 4).

**A**

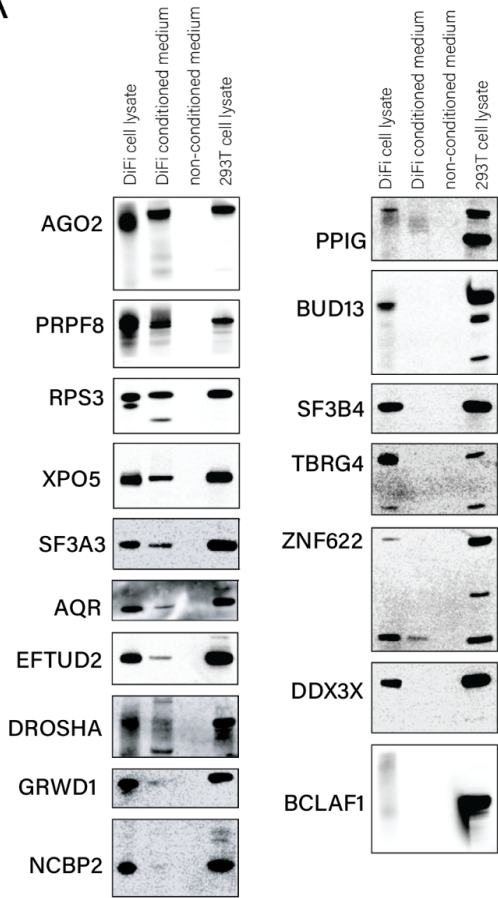

**B**

| RBP     | 293T cond. media WB | hMSC cond. media WB | DiFi cond. media WB | Plasma mass spectrometry |
|---------|---------------------|---------------------|---------------------|--------------------------|
| AQR     | Detected            | Not expressed       | Detected            | Detected                 |
| BCLAF1  | Not detected        | Not expressed       | No detected         | Detected                 |
| BUD13   |                     |                     | No detected         | Not detected             |
| CSTF2T  |                     |                     |                     | Not detected             |
| DDX3X   | Not detected        | Not detected        | No detected         | Detected                 |
| DGCR8   | Detected            | Not detected        |                     | Detected                 |
| DHX30   |                     |                     |                     | Not detected             |
| DROSHA  |                     |                     |                     | Detected                 |
| EFTUD2  | Detected            | Detected            | Detected            | Detected                 |
| EXOSC5  |                     |                     |                     | Detected                 |
| FASTKD2 |                     |                     |                     | Not detected             |
| FTO     | Detected            | Detected            |                     | Detected                 |
| GEMIN5  |                     |                     |                     | Detected                 |
| GRWD1   | Detected            | Detected            | Detected            | Detected                 |
| HNRNPL  |                     |                     |                     | Detected                 |
| ILF3    | Detected            | Detected            |                     | Detected                 |
| KHSRP   |                     |                     |                     | Detected                 |
| LARP7   |                     |                     |                     | Not detected             |
| LIN28B  | Detected            | Not expressed       |                     | Not detected             |
| NCBP2   | Detected            | Not detected        | Detected            | Detected                 |
| NKRF    |                     |                     |                     | Detected                 |
| PPIG    | Not detected        | Not expressed       | Not expressed       | Detected                 |
| PRPF4   |                     |                     |                     | Detected                 |
| PRPF8   | Not detected        | Detected            | Detected            | Detected                 |
| RPS3    | Detected            | Not detected        | Detected            | Detected                 |
| SF3A3   | Detected            | Detected            | Detected            | Detected                 |
| SF3B4   | Detected            | Detected            | No detected         | Detected                 |
| SLBP    |                     |                     |                     | Detected                 |
| SSB     | Detected            | Detected            |                     | Not detected             |
| TBRG4   |                     |                     | No detected         | Not detected             |
| UPF1    |                     |                     |                     | Detected                 |
| XPO5    | Detected            | Detected            | Detected            | Not detected             |
| ZNF622  | Detected            | Not expressed       | No detected         | Detected                 |
| ZNF800  |                     |                     |                     | Not detected             |
|         | 14/18               | 9/18                | 8/15                | 24/34                    |
|         | 27/34               |                     |                     |                          |

**C**

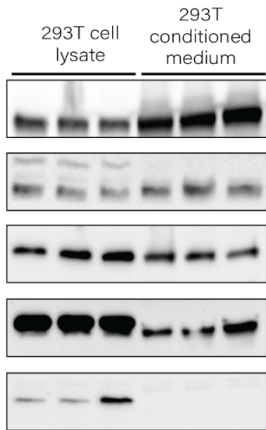

**D**

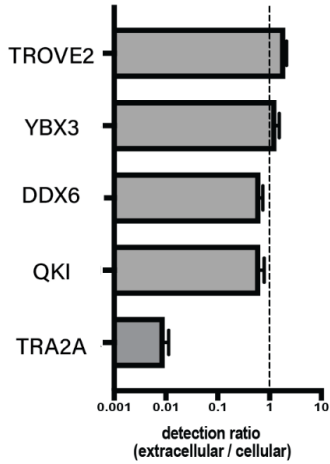

### Figure S3

**RBP detection in DiFi and HEK293T cell media, Related to Figure 3.** **A)** Western blots performed on DiFi cell lysate, DiFi cell media, and HEK293T lysate with a media negative control. **B)** Summary table of the RBPs tested in the three cell types and mass spectrometry with corresponding detection success. **C)** Western blots performed in triplicate on HEK293T cell lysate and conditioned media for RBPs candidates computationally predicted in cell conditioned media. **D)** Ratio of detected signal between HEK293T conditioned medium and corresponding cell lysate blots. A value greater than one indicates a stronger detection of the RBP in the extracellular space, while below one shows a higher quantification intracellularly. Data are represented as mean + SD.

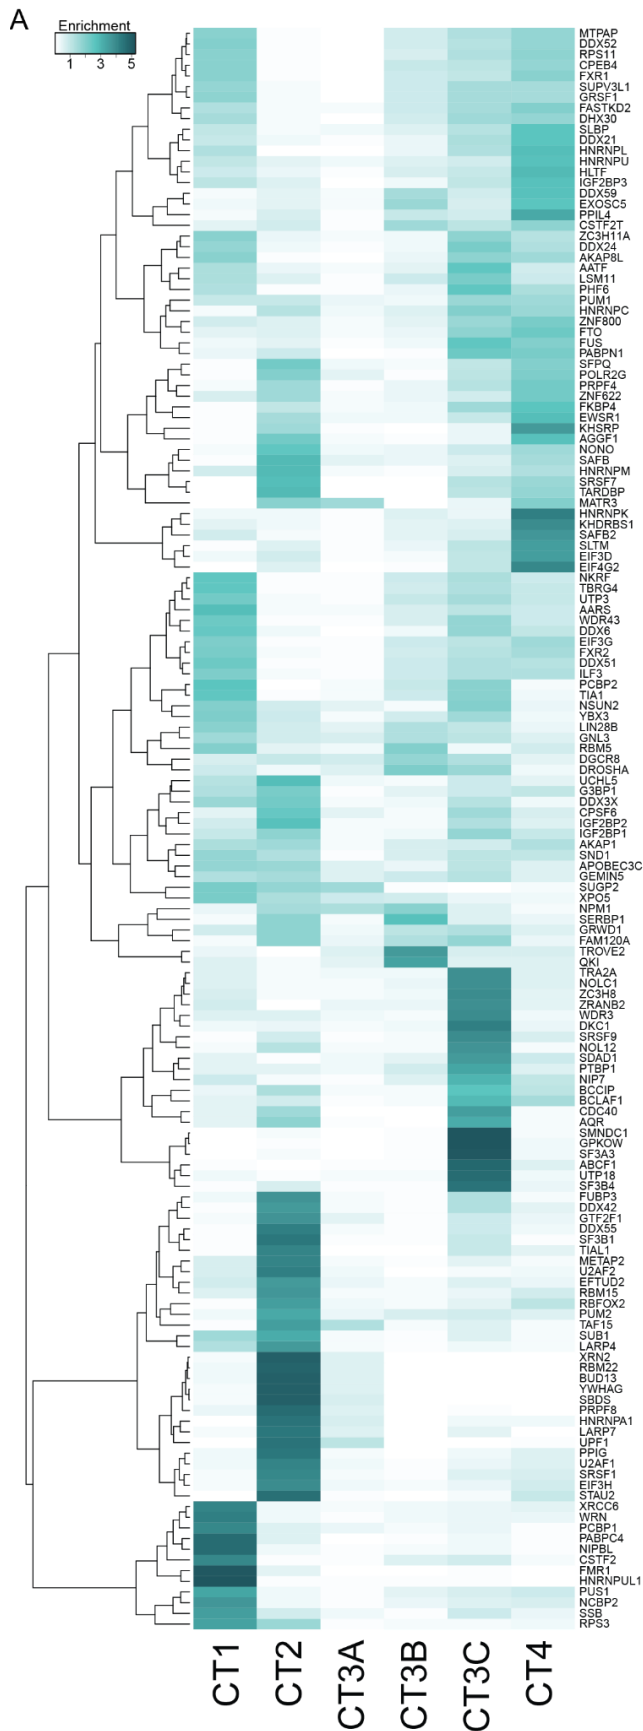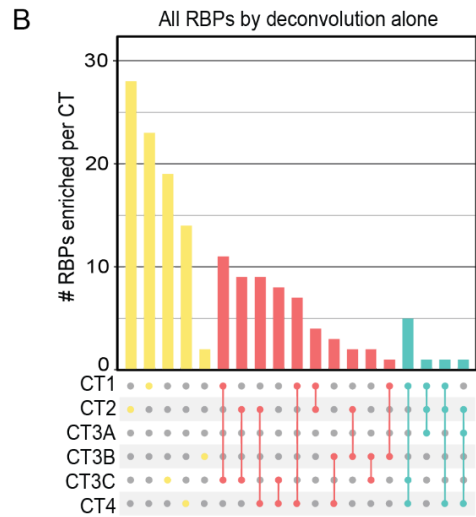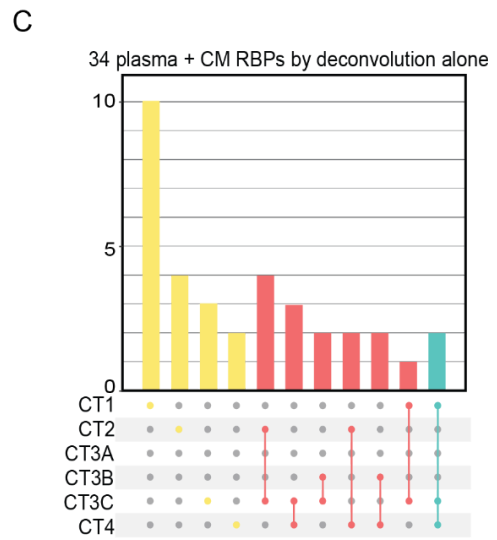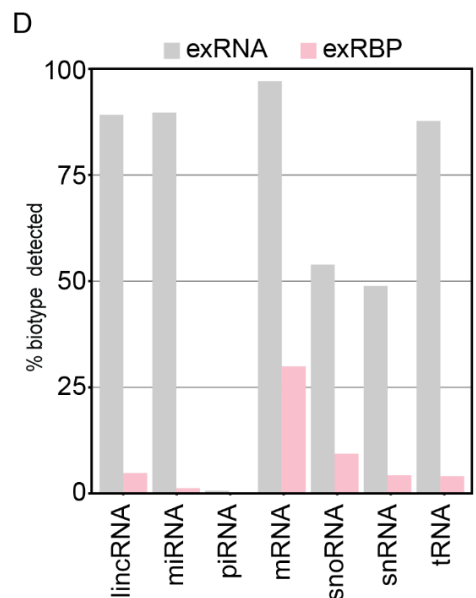



## Figure S4

**XDec deconvolution of human biofluids allows assignment of RBP cargo to exRNA carrier types, Related to Figure 4.** **A)** Heatmap of RBP CT enrichments with rows labeled. **B)** Upset plot depicts how many RBPs are enriched for 1 or 2 different cargo types in deconvoluted profiles (regardless of enrichment in reference fractionated plasma/serum). **C)** Subset of Figure S4B for the 34 RBPs detected in bulk plasma and cell media (Figure S2C). **D)** Percent of biotype represented in exRNA Atlas with a coverage of 5 reads in at least one sample, vs those touched by at least 1 RBP site with a coverage of 5 reads in at least one sample in the studies used for deconvolution.

**Table S1 – CT enrichments of all 150 RBPs, Related to Figure 4**

|          | CT1 | CT2 | CT3A | CT3B | CT3C | CT4 |
|----------|-----|-----|------|------|------|-----|
| AARS     | 1   | 0   | 0    | 0    | 0    | 0   |
| AATF     | 0   | 0   | 0    | 0    | 1    | 0   |
| ABCF1    | 0   | 0   | 0    | 0    | 1    | 0   |
| AGGF1    | 0   | 1   | 0    | 0    | 0    | 1   |
| AKAP1    | 1   | 1   | 0    | 0    | 0    | 0   |
| AKAP8L   | 1   | 0   | 0    | 0    | 1    | 1   |
| APOBEC3C | 1   | 1   | 0    | 0    | 0    | 0   |
| AQR      | 0   | 1   | 0    | 0    | 1    | 0   |
| BCCIP    | 0   | 1   | 0    | 0    | 1    | 0   |
| BCLAF1   | 0   | 0   | 0    | 0    | 1    | 1   |
| BUD13    | 0   | 1   | 0    | 0    | 0    | 0   |
| CDC40    | 0   | 1   | 0    | 0    | 1    | 0   |
| CPEB4    | 1   | 0   | 0    | 0    | 0    | 1   |
| CPSF6    | 0   | 1   | 0    | 0    | 1    | 0   |
| CSTF2T   | 0   | 0   | 0    | 1    | 0    | 1   |
| CSTF2    | 1   | 0   | 0    | 0    | 0    | 0   |
| DDX21    | 0   | 0   | 0    | 0    | 0    | 1   |
| DDX24    | 1   | 0   | 0    | 0    | 1    | 0   |
| DDX3X    | 1   | 0   | 0    | 0    | 0    | 0   |
| DDX42    | 0   | 1   | 0    | 0    | 0    | 0   |
| DDX51    | 1   | 0   | 0    | 0    | 0    | 0   |
| DDX52    | 1   | 0   | 0    | 0    | 0    | 1   |
| DDX55    | 0   | 1   | 0    | 0    | 0    | 0   |
| DDX59    | 0   | 0   | 0    | 1    | 0    | 1   |
| DDX6     | 1   | 0   | 0    | 0    | 1    | 0   |
| DGCR8    | 0   | 0   | 0    | 1    | 1    | 0   |
| DHX30    | 1   | 0   | 0    | 0    | 1    | 1   |
| DKC1     | 0   | 0   | 0    | 0    | 1    | 0   |
| DROSHA   | 0   | 0   | 0    | 1    | 1    | 0   |
| EFTUD2   | 1   | 0   | 0    | 0    | 0    | 0   |
| EIF3D    | 0   | 0   | 0    | 0    | 0    | 1   |
| EIF3G    | 1   | 0   | 0    | 0    | 0    | 1   |
| EIF3H    | 0   | 1   | 0    | 0    | 0    | 0   |
| EIF4G2   | 0   | 0   | 0    | 0    | 0    | 1   |
| EWSR1    | 0   | 1   | 0    | 0    | 0    | 1   |
| EXOSC5   | 0   | 0   | 0    | 1    | 0    | 1   |
| FAM120A  | 0   | 1   | 0    | 0    | 1    | 0   |
| FASTKD2  | 1   | 0   | 0    | 0    | 1    | 0   |
| FKBP4    | 0   | 0   | 0    | 0    | 1    | 1   |
| FMR1     | 1   | 0   | 0    | 0    | 0    | 0   |
| FTO      | 0   | 0   | 0    | 0    | 1    | 1   |
| FUBP3    | 0   | 1   | 0    | 0    | 0    | 0   |
| FUS      | 0   | 0   | 0    | 0    | 1    | 1   |
| FXR1     | 1   | 0   | 0    | 0    | 0    | 1   |
| FXR2     | 1   | 0   | 0    | 0    | 0    | 1   |
| G3BP1    | 0   | 1   | 0    | 0    | 0    | 0   |

|          |   |   |   |   |   |   |
|----------|---|---|---|---|---|---|
| GEMIN5   | 0 | 1 | 0 | 0 | 0 | 0 |
| GNL3     | 1 | 0 | 0 | 0 | 0 | 0 |
| GPKOW    | 0 | 0 | 0 | 0 | 1 | 0 |
| GRSF1    | 1 | 0 | 0 | 0 | 1 | 1 |
| GRWD1    | 0 | 1 | 0 | 0 | 1 | 0 |
| GTF2F1   | 0 | 1 | 0 | 0 | 0 | 0 |
| HLTF     | 0 | 0 | 0 | 0 | 0 | 1 |
| HNRNPA1  | 0 | 1 | 0 | 0 | 0 | 0 |
| HNRNPC   | 0 | 0 | 0 | 0 | 1 | 0 |
| HNRNPK   | 0 | 0 | 0 | 0 | 0 | 1 |
| HNRNPL   | 1 | 0 | 0 | 0 | 1 | 1 |
| HNRNPM   | 1 | 1 | 0 | 0 | 0 | 1 |
| HNRNPUL1 | 1 | 0 | 0 | 0 | 0 | 0 |
| HNRNPU   | 0 | 0 | 0 | 0 | 0 | 1 |
| IGF2BP1  | 0 | 1 | 0 | 0 | 1 | 0 |
| IGF2BP2  | 0 | 1 | 0 | 0 | 0 | 0 |
| IGF2BP3  | 0 | 0 | 0 | 0 | 0 | 1 |
| ILF3     | 1 | 0 | 0 | 0 | 0 | 0 |
| KHDRBS1  | 0 | 0 | 0 | 0 | 0 | 1 |
| KHSRP    | 0 | 0 | 0 | 0 | 0 | 1 |
| LARP4    | 0 | 1 | 0 | 0 | 0 | 0 |
| LARP7    | 0 | 1 | 0 | 0 | 1 | 0 |
| LIN28B   | 1 | 0 | 0 | 0 | 0 | 0 |
| LSM11    | 1 | 0 | 0 | 0 | 1 | 0 |
| MATR3    | 0 | 1 | 1 | 0 | 0 | 1 |
| METAP2   | 0 | 1 | 0 | 0 | 0 | 0 |
| MTPAP    | 1 | 0 | 0 | 0 | 0 | 1 |
| NCBP2    | 1 | 0 | 0 | 0 | 0 | 0 |
| NIP7     | 0 | 0 | 0 | 0 | 1 | 0 |
| NIPBL    | 1 | 0 | 0 | 0 | 0 | 0 |
| NKRF     | 1 | 0 | 0 | 0 | 0 | 0 |
| NOL12    | 0 | 0 | 0 | 0 | 1 | 0 |
| NOLC1    | 0 | 0 | 0 | 0 | 1 | 0 |
| NONO     | 0 | 1 | 0 | 0 | 0 | 1 |
| NPM1     | 0 | 1 | 0 | 1 | 0 | 0 |
| NSUN2    | 1 | 0 | 0 | 0 | 1 | 0 |
| PABPC4   | 1 | 0 | 0 | 0 | 0 | 0 |
| PABPN1   | 0 | 0 | 0 | 0 | 1 | 1 |
| PCBP1    | 1 | 0 | 0 | 0 | 0 | 0 |
| PCBP2    | 1 | 0 | 0 | 0 | 1 | 0 |
| PHF6     | 0 | 0 | 0 | 0 | 1 | 1 |
| POLR2G   | 0 | 1 | 0 | 0 | 0 | 1 |
| PPIG     | 0 | 1 | 0 | 0 | 0 | 0 |
| PPIL4    | 0 | 0 | 0 | 0 | 0 | 1 |
| PRPF4    | 0 | 1 | 0 | 0 | 0 | 1 |
| PRPF8    | 0 | 1 | 0 | 0 | 0 | 0 |
| PTBP1    | 0 | 0 | 0 | 0 | 1 | 0 |
| PUM1     | 0 | 0 | 0 | 0 | 1 | 1 |
| PUM2     | 0 | 1 | 0 | 0 | 0 | 0 |
| PUS1     | 1 | 0 | 0 | 0 | 0 | 0 |
| QKI      | 0 | 0 | 0 | 1 | 0 | 0 |
| RBFOX2   | 0 | 1 | 0 | 0 | 0 | 0 |

|         |   |   |   |   |   |   |
|---------|---|---|---|---|---|---|
| RBM15   | 0 | 1 | 0 | 0 | 0 | 0 |
| RBM22   | 0 | 1 | 0 | 0 | 0 | 0 |
| RBM5    | 1 | 0 | 0 | 1 | 0 | 0 |
| RPS11   | 1 | 0 | 0 | 0 | 0 | 1 |
| RPS3    | 1 | 0 | 0 | 0 | 0 | 0 |
| SAFB2   | 0 | 0 | 0 | 0 | 0 | 1 |
| SAFB    | 0 | 1 | 0 | 0 | 0 | 1 |
| SBDS    | 0 | 1 | 0 | 0 | 0 | 0 |
| SDAD1   | 0 | 0 | 0 | 0 | 1 | 0 |
| SERBP1  | 0 | 1 | 0 | 1 | 0 | 0 |
| SF3A3   | 0 | 0 | 0 | 0 | 1 | 0 |
| SF3B1   | 0 | 1 | 0 | 0 | 0 | 0 |
| SF3B4   | 0 | 0 | 0 | 0 | 1 | 0 |
| SFPQ    | 0 | 1 | 0 | 0 | 0 | 1 |
| SLBP    | 0 | 0 | 0 | 0 | 0 | 1 |
| SLTM    | 0 | 0 | 0 | 0 | 0 | 1 |
| SMNDC1  | 0 | 0 | 0 | 0 | 1 | 0 |
| SND1    | 1 | 0 | 0 | 0 | 0 | 0 |
| SRSF1   | 0 | 1 | 0 | 0 | 0 | 0 |
| SRSF7   | 0 | 0 | 0 | 0 | 0 | 1 |
| SRSF9   | 0 | 0 | 0 | 0 | 1 | 0 |
| SSB     | 1 | 0 | 0 | 0 | 0 | 0 |
| STAU2   | 0 | 1 | 0 | 0 | 0 | 0 |
| SUB1    | 1 | 1 | 0 | 0 | 0 | 0 |
| SUGP2   | 1 | 1 | 1 | 0 | 0 | 0 |
| SUPV3L1 | 1 | 0 | 0 | 0 | 1 | 1 |
| TAF15   | 0 | 1 | 0 | 0 | 0 | 0 |
| TARDBP  | 0 | 1 | 0 | 0 | 0 | 1 |
| TBRG4   | 1 | 0 | 0 | 0 | 0 | 0 |
| TIA1    | 1 | 0 | 0 | 0 | 1 | 0 |
| TIAL1   | 0 | 1 | 0 | 0 | 0 | 0 |
| TRA2A   | 0 | 0 | 0 | 0 | 1 | 0 |
| TROVE2  | 0 | 0 | 0 | 1 | 0 | 0 |
| U2AF1   | 0 | 1 | 0 | 0 | 0 | 0 |
| U2AF2   | 0 | 1 | 0 | 0 | 0 | 0 |
| UCHL5   | 1 | 1 | 0 | 0 | 0 | 0 |
| UPF1    | 0 | 1 | 0 | 0 | 1 | 0 |
| UTP18   | 0 | 0 | 0 | 0 | 1 | 0 |
| UTP3    | 1 | 0 | 0 | 0 | 1 | 0 |
| WDR3    | 0 | 0 | 0 | 0 | 1 | 0 |
| WDR43   | 1 | 0 | 0 | 0 | 1 | 0 |
| WRN     | 1 | 0 | 0 | 0 | 0 | 0 |
| XPO5    | 1 | 0 | 0 | 0 | 0 | 0 |
| XRCC6   | 1 | 0 | 0 | 0 | 0 | 0 |
| XRN2    | 0 | 1 | 0 | 0 | 0 | 0 |
| YBX3    | 1 | 0 | 0 | 0 | 1 | 0 |
| YWHAG   | 0 | 1 | 0 | 0 | 0 | 0 |
| ZC3H11A | 1 | 0 | 0 | 0 | 1 | 0 |
| ZC3H8   | 0 | 0 | 0 | 0 | 1 | 0 |
| ZNF622  | 0 | 1 | 0 | 0 | 0 | 1 |
| ZNF800  | 0 | 0 | 0 | 0 | 1 | 1 |
| ZRANB2  | 0 | 0 | 0 | 0 | 1 | 0 |

**Table S2 – CT enrichments of 47 consistently enriched RBPs, Related to Figure 4**

|          | CT1 | CT2 | CT3A | CT3B | CT3C | CT4 |
|----------|-----|-----|------|------|------|-----|
| APOBEC3C | 1   | 0   | 0    | 0    | 0    | 0   |
| CSTF2    | 1   | 0   | 0    | 0    | 0    | 0   |
| FASTKD2  | 1   | 0   | 0    | 0    | 0    | 0   |
| FMR1     | 1   | 0   | 0    | 0    | 0    | 0   |
| GNL3     | 1   | 0   | 0    | 0    | 0    | 0   |
| HNRNPM   | 1   | 0   | 0    | 0    | 0    | 0   |
| LIN28B   | 1   | 0   | 0    | 0    | 0    | 0   |
| SSB      | 1   | 0   | 0    | 0    | 0    | 0   |
| SUB1     | 1   | 0   | 0    | 0    | 0    | 0   |
| TIA1     | 1   | 0   | 0    | 0    | 1    | 0   |
| YBX3     | 1   | 0   | 0    | 0    | 0    | 0   |
| AKAP1    | 0   | 1   | 0    | 0    | 0    | 0   |
| GEMIN5   | 0   | 1   | 0    | 0    | 0    | 0   |
| HNRNPA1  | 0   | 1   | 0    | 0    | 0    | 0   |
| RBM22    | 0   | 1   | 0    | 0    | 0    | 0   |
| SERBP1   | 0   | 1   | 0    | 0    | 0    | 0   |
| TAF15    | 0   | 1   | 0    | 0    | 0    | 0   |
| U2AF2    | 0   | 1   | 0    | 0    | 0    | 0   |
| AGGF1    | 0   | 0   | 0    | 0    | 0    | 1   |
| POLR2G   | 0   | 0   | 0    | 0    | 0    | 1   |
| PPIL4    | 0   | 0   | 0    | 0    | 0    | 1   |
| SFPQ     | 0   | 0   | 0    | 0    | 0    | 1   |
| DDX59    | 0   | 0   | 0    | 1    | 0    | 0   |
| EXOSC5   | 0   | 0   | 0    | 1    | 0    | 0   |
| QKI      | 0   | 0   | 0    | 1    | 0    | 0   |
| TROVE2   | 0   | 0   | 0    | 1    | 0    | 0   |
| ABCF1    | 0   | 0   | 0    | 0    | 1    | 0   |
| AQR      | 0   | 0   | 0    | 0    | 1    | 0   |
| CDC40    | 0   | 0   | 0    | 0    | 1    | 0   |
| CPSF6    | 0   | 0   | 0    | 0    | 1    | 0   |
| DKC1     | 0   | 0   | 0    | 0    | 1    | 0   |
| FAM120A  | 0   | 0   | 0    | 0    | 1    | 0   |
| LARP7    | 0   | 0   | 0    | 0    | 1    | 0   |
| NIP7     | 0   | 0   | 0    | 0    | 1    | 0   |
| NOL12    | 0   | 0   | 0    | 0    | 1    | 0   |
| NOLC1    | 0   | 0   | 0    | 0    | 1    | 0   |
| PABPN1   | 0   | 0   | 0    | 0    | 1    | 0   |
| PTBP1    | 0   | 0   | 0    | 0    | 1    | 0   |
| PUM1     | 0   | 0   | 0    | 0    | 1    | 0   |
| SMNDC1   | 0   | 0   | 0    | 0    | 1    | 0   |
| TRA2A    | 0   | 0   | 0    | 0    | 1    | 0   |
| UPF1     | 0   | 0   | 0    | 0    | 1    | 0   |
| UTP18    | 0   | 0   | 0    | 0    | 1    | 0   |
| WDR3     | 0   | 0   | 0    | 0    | 1    | 0   |
| WDR43    | 0   | 0   | 0    | 0    | 1    | 0   |
| ZC3H8    | 0   | 0   | 0    | 0    | 1    | 0   |
| ZRANB2   | 0   | 0   | 0    | 0    | 1    | 0   |

**Table S3 – exRNA-atlas.org accessions of studies used in analysis, related to STAR Methods**

| Accession               | Biofluids                                                                                              | Accession           | Biofluids            |
|-------------------------|--------------------------------------------------------------------------------------------------------|---------------------|----------------------|
| EXR-DERLE1Dj6liR-AN     | Plasma                                                                                                 | EXR-DGALA1ECRXVs-AN | CSF                  |
| EXR-DGALA1V5h5va-AN     | Plasma                                                                                                 | EXR-DGALA1mUDpAe-AN | CSF                  |
| EXR-KVICK1oIp40e-AN     | Plasma                                                                                                 | EXR-DGALA1QDi9GG-AN | CSF                  |
| EXR-JJONE1wAX8tF-AN     | Plasma                                                                                                 | EXR-KJENS1sPlvS2-AN | CSF, Serum           |
| EXR-KJENS17CZMbP-AN     | Plasma                                                                                                 | EXR-ANACC1S6IJ1C-AN | Plasma, Stool, Urine |
| EXR-SADAS1EXER1-AN      | Plasma                                                                                                 | EXR-JJONE1HC7DHb-AN | Urine                |
| EXR-MTEWA1ZR3Xg6-AN     | Plasma, Serum                                                                                          | EXR-JJONE1tHRzcU-AN | Urine                |
| EXR-KJENS10IPCIY-AN     | Plasma                                                                                                 | EXR-DWONG1qf3tcS-AN | Saliva               |
| EXR-MTEWA1cHYLo6-AN     | Plasma, Serum                                                                                          | EXR-IGHIR1HnDH6K-AN | Plasma, Serum        |
| EXR-MTEWA1vczugX-AN     | Plasma                                                                                                 | EXR-JJONE1AcUuui-AN | Serum                |
| EXR-KJENS1RID1-AN       | Plasma, Urine, Saliva                                                                                  | EXR-LLAUR1s0A1mX-AN | Serum                |
| EXR-AWEAV1IyeWbT-AN     | Condition Medium                                                                                       | EXR-LLAUR1SFszrF-AN | Plasma, Serum        |
| EXR-AKRIC157ITEI-AN     | Condition Medium                                                                                       | EXR-TTUSC1gCrGDH-AN | Plasma, Serum        |
| EXR-JFRAN1cDpMBU-AN     | Condition Medium                                                                                       | EXR-KJENS12WGutU-AN | CSF                  |
| EXR-JFRAN16VDqI8-AN     | Condition Medium                                                                                       | EXR-KJENS1WBaSro-AN | CSF, Plasma          |
| EXR-DGALA17UKOTF-AN     | CSF                                                                                                    | EXR-TPATE1OqELff-AN | Plasma               |
| EXR-DGALA1adMfMp-AN     | CSF                                                                                                    | EXR-MBITZ12SHVlr-AN | Urine                |
| EXR-DGALA1B2gzMc-AN     | CSF                                                                                                    | EXR-SADAS1UJ0CzW-AN | Plasma               |
| EXR-DERLE1PHASE1PROT-AN | Saliva, Sputum, Ovarian Follicle Fluid, Seminal Fluid, Amniotic Fluid, Plasma, Serum, CSF, BALF, Urine |                     |                      |

**Table S4 – Detection of off strand reads, related to STAR Methods**

|        | Av Wrong Strand |        | Av Wrong Strand |        | Av Wrong Strand |
|--------|-----------------|--------|-----------------|--------|-----------------|
| DDX42  | 0%              | WDR43  | 0%              | GTF2F1 | 1%              |
| CDC40  | 0%              | PUM2   | 0%              | TBRG4  | 1%              |
| NSUN2  | 0%              | SLBP   | 0%              | SERBP1 | 1%              |
| GPKOW  | 0%              | SF3B1  | 0%              | HNRNPC | 1%              |
| SF3A3  | 0%              | DROSHA | 0%              | EXOSC5 | 1%              |
| GEMIN5 | 0%              | RPS3   | 0%              | PTBP1  | 1%              |
| SMNDC1 | 0%              | LIN28B | 0%              | AGGF1  | 1%              |
| SSB    | 0%              | ZNF622 | 0%              | EIF4G2 | 1%              |
| TAF15  | 0%              | SND1   | 0%              | SAFB2  | 1%              |

|          |    |         |    |         |     |
|----------|----|---------|----|---------|-----|
| SF3B4    | 0% | DDX52   | 0% | DHX30   | 1%  |
| TROVE2   | 0% | SUB1    | 0% | POLR2G  | 1%  |
| AQR      | 0% | UTP3    | 0% | SAFB    | 1%  |
| XRCC6    | 0% | EIF3G   | 0% | TIA1    | 1%  |
| FKBP4    | 0% | QKI     | 0% | GNL3    | 1%  |
| NPM1     | 0% | NIPBL   | 0% | ZC3H11A | 2%  |
| WRN      | 0% | NCBP2   | 0% | ABCF1   | 2%  |
| DKC1     | 0% | UTP18   | 0% | FXR1    | 2%  |
| HNRNPUL1 | 0% | NIP7    | 0% | FUS     | 2%  |
| DDX21    | 0% | NKRF    | 0% | PRPF4   | 2%  |
| NOLC1    | 0% | FAM120A | 0% | PABPC4  | 2%  |
| BCCIP    | 0% | CPSF6   | 0% | RBFOX2  | 2%  |
| PUM1     | 0% | PPIG    | 0% | IGF2BP3 | 2%  |
| EIF3D    | 0% | BUD13   | 0% | RPS11   | 2%  |
| SUPV3L1  | 0% | PHF6    | 0% | HLTF    | 3%  |
| WDR3     | 0% | XRN2    | 0% | RBM5    | 3%  |
| EFTUD2   | 0% | GRWD1   | 0% | FMR1    | 3%  |
| XPO5     | 0% | SRSF1   | 0% | LARP4   | 3%  |
| DDX51    | 0% | ZNF800  | 0% | PABPN1  | 3%  |
| RBM22    | 0% | TRA2A   | 0% | FUBP3   | 3%  |
| APOBEC3C | 0% | DDX24   | 0% | KHSRP   | 3%  |
| ZRANB2   | 0% | BCLAF1  | 0% | HNRNPU  | 5%  |
| DDX6     | 0% | SRSF9   | 0% | SUGP2   | 6%  |
| NOL12    | 0% | YWHAG   | 0% | SLTM    | 9%  |
| SRSF7    | 0% | IGF2BP1 | 0% | AKAP1   | 9%  |
| LARP7    | 0% | FXR2    | 0% | SFPQ    | 14% |
| SBDS     | 0% | AARS    | 0% | TIAL1   | 15% |
| IGF2BP2  | 0% | HNRNPM  | 0% | EWSR1   | 16% |
| AKAP8L   | 0% | STAU2   | 0% | CPEB4   | 16% |
| METAP2   | 0% | FASTKD2 | 0% | ILF3    | 23% |
| FTO      | 0% | PCBP1   | 0% | HNRNPA1 | 23% |
| EIF3H    | 0% | TARDBP  | 0% | CSTF2   | 24% |
| PRPF8    | 0% | YBX3    | 0% | KHDRBS1 | 37% |
| ZC3H8    | 0% | UCHL5   | 0% | U2AF2   | 40% |
| DGCR8    | 0% | UPF1    | 0% | NONO    | 45% |
| SDAD1    | 0% | PUS1    | 0% | CSTF2T  | 45% |
| U2AF1    | 0% | GRSF1   | 0% | DDX59   | 48% |
| DDX55    | 0% | PPIL4   | 0% | HNRNPK  | 54% |
| MTPAP    | 0% | DDX3X   | 0% | HNRNPL  | 61% |
| AATF     | 0% | LSM11   | 0% | PCBP2   | 63% |
| G3BP1    | 0% | RBM15   | 1% | MATR3   | 88% |
